# Supplementary material for: Superstructure Ta2O5 mesocrystals derived from (NH4)2Ta2O3F6 mesocrystals with efficient photocatalytic activity
Source: Royal Society of Chemistry journal article supplement (doi:10.1039/c7dt04371f), 2018-01-01
Supplement: c7dt04371f1.pdf [file c7dt04371f1.pdf]

# Superstructure Ta<sub>2</sub>O<sub>5</sub> mesocrystals derived from (NH<sub>4</sub>)<sub>2</sub>Ta<sub>2</sub>O<sub>3</sub>F<sub>6</sub> mesocrystals with efficient photocatalytic activity

Xin Yu,<sup>a,b,c</sup> Wei Li,<sup>a,b,c</sup> Jian Huang,<sup>a,b,c</sup> Zhonghua Li,<sup>\*a,b</sup> Jiawen Liu,<sup>\*d</sup> PingAn Hu<sup>\*a</sup>

<sup>a</sup> Key Laboratory of Microsystems and Microstructures Manufacturing, Ministry of Education, Harbin Institute of Technology, Harbin 150001, P. R. China.

<sup>b</sup> Academy of Fundamental and Interdisciplinary Sciences, Harbin Institute of Technology, Harbin 150001, P. R. China.

<sup>c</sup> School of Chemistry and Chemical Engineering, Harbin Institute of Technology, Harbin 150001, P. R. China.

<sup>d</sup> Key Laboratory for Photochemical Biomaterials and Energy Storage Materials, Heilongjiang Province and College of Chemistry and Chemical Engineering, Harbin Normal University, Harbin 150025, PR China.

\*Corresponding author. Tel.: +86-0451-86403196.

E-mail: lizh@hit.edu.cn (Z. Li); jiawenliu86@163.com (J. Liu); hupa@hit.edu.cn (P. Hu).

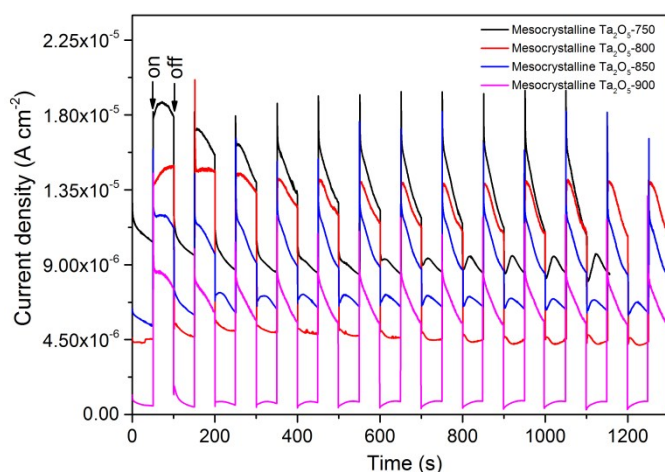

Fig. S1 Transient photocurrent response of mesocrystalline Ta<sub>2</sub>O<sub>5</sub> nanosheets.
